# Supplementary material
Source: Springer Nature journal article supplement (https://www.springermedizin.de/resource/supplementary/12890_2006_52_MOESM3_ESM.pdf/9505862)

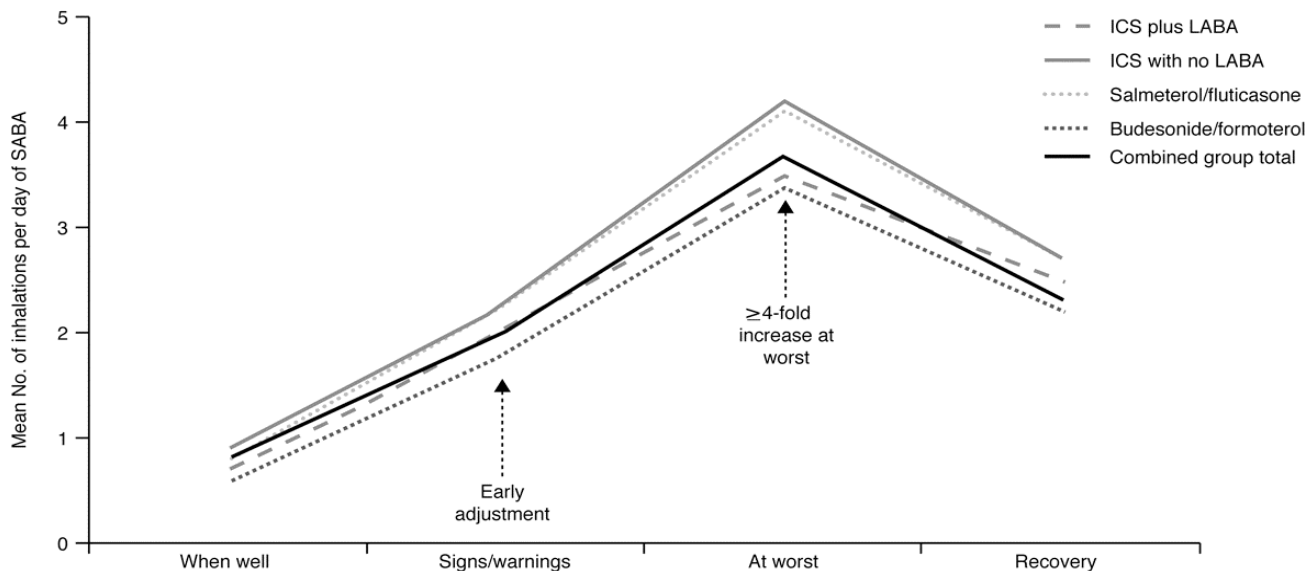

n=3411

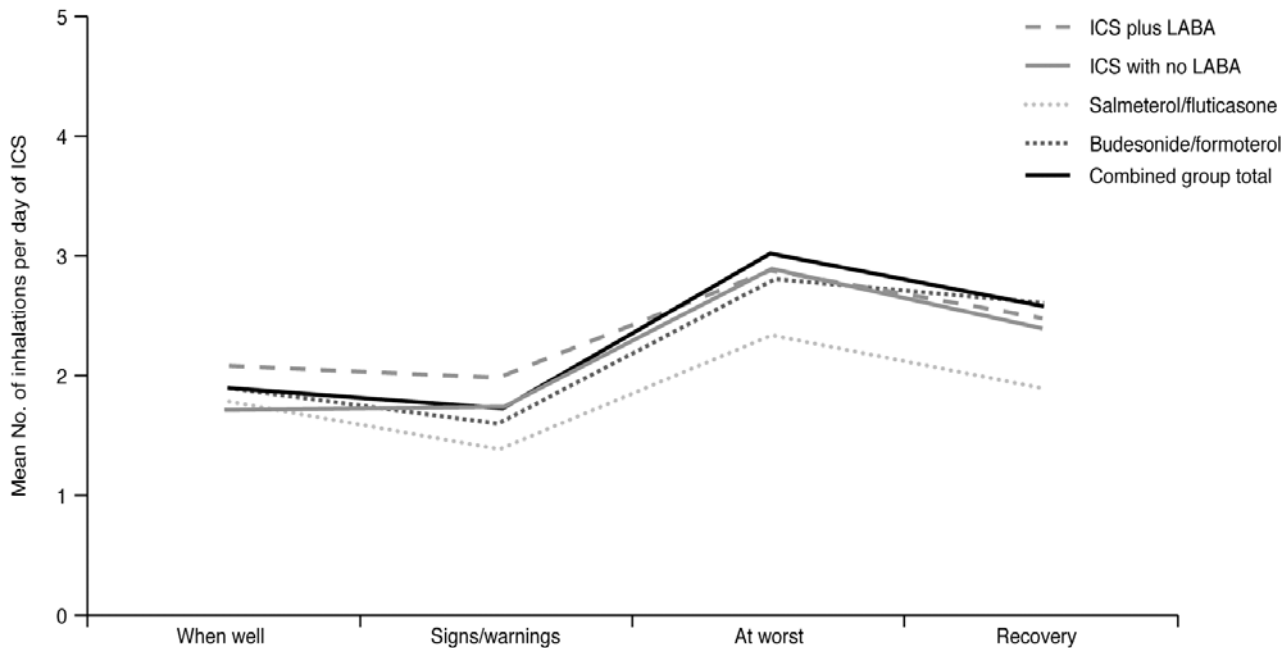

n=3411

Supplement: MOESM3 [file 9505862]
